# Supplementary material for: Sildenafil for bronchopulmonary dysplasia and pulmonary hypertension: a meta-analysis
Source: PubMed Central journal article supplement — Pulm Circ. 2019 Aug 2;9(3):2045894019837875. doi: 10.1177/2045894019837875 (PMC6681505; doi:10.1177/2045894019837875), 2019-08-02
Supplement: Supplemental_Material.pdf [file Supplemental_Material.pdf]

**Supplement to:** Sildenafil for bronchopulmonary dysplasia and pulmonary hypertension: a meta-analysis

**Embase.com (337 results):** ('pulmonary hypertension'/de OR (((pulmonar\* OR lung) NEAR/3 (hypertensi\*))) :ab,ti) AND ('lung dysplasia'/de OR (((lung OR bronchopulmonar\* OR pulmonar\*) NEAR/3 (dysplasi\*))) :ab,ti) AND ('drug therapy'/exp OR drug/exp OR 'pulmonary hypertension'/de/dm\_dt OR pharmacology/exp OR 'antihypertensive agent'/exp OR 'antithrombocytic agent'/exp OR 'endothelin receptor affecting agent'/exp OR (drug\* OR agent\* OR pharmac\* OR medication\* OR antihypertens\* OR anti-hypertens\* OR antithrombo\* OR anti-thrombo\* OR Sildenafil\* OR prostacyclin\* OR Epoprostenol\* OR bosentan\* OR (Endothelin\* NEAR/3 Receptor\* NEAR/3 (Antagonist\* OR affect\*))) :ab,ti) AND [english]/lim NOT ([Conference Abstract]/lim OR [Letter]/lim OR [Note]/lim OR [Editorial]/lim)

**Medline Ovid (32 results):** (exp "Hypertension, Pulmonary"/ OR (((pulmonar\* OR lung) ADJ3 (hypertensi\*))) :ab,ti.) AND ("Bronchopulmonary Dysplasia"/ OR (((lung OR bronchopulmonar\* OR pulmonar\*) ADJ3 (dysplasi\*))) :ab,ti.) AND (exp "Drug Therapy"/ OR exp Pharmaceutical Preparations/ OR "Hypertension, Pulmonary"/dt OR exp pharmacology/ OR pharmacology.xs. OR exp "Antihypertensive Agents"/ OR exp "Endothelin Receptor Antagonists"/ OR (drug\* OR agent\* OR pharmac\* OR medication\* OR antihypertens\* OR anti-hypertens\* OR antithrombo\* OR anti-thrombo\* OR Sildenafil\* OR prostacyclin\* OR Epoprostenol\* OR bosentan\* OR (Endothelin\* ADJ3 Receptor\* ADJ3 (Antagonist\* OR affect\*))) :ab,ti.) AND english.la. NOT (letter OR news OR comment OR editorial OR congresses OR abstracts).pt.

**Cochrane (1 result):** (((((pulmonar\* OR lung) NEAR/3 (hypertensi\*))) :ab,ti) AND (((lung OR bronchopulmonar\* OR pulmonar\*) NEAR/3 (dysplasi\*))) :ab,ti) AND ((drug\* OR agent\* OR pharmac\* OR medication\* OR antihypertens\* OR anti-hypertens\* OR antithrombo\* OR anti-thrombo\* OR Sildenafil\* OR prostacyclin\* OR Epoprostenol\* OR bosentan\* OR (Endothelin\* NEAR/3 Receptor\* NEAR/3 (Antagonist\* OR affect\*))) :ab,ti)
